# Supplementary material for: Cooperative CRF and α1 Adrenergic Signaling in the VTA Promotes NMDA Plasticity and Drives Social Stress Enhancement of Cocaine Conditioning
Source: PubMed Central journal article supplement — Cell Rep. Author manuscript; Available in PMC 2018 Mar 30. (PMC5877815; doi:10.1016/j.celrep.2018.02.039), 2018-03-06
Supplement: NIHMS953604-supplement-1.pdf [file NIHMS953604-supplement-1.pdf]

Cell Reports, Volume 22

## Supplemental Information

### **Cooperative CRF and $\alpha$ 1 Adrenergic Signaling in the VTA Promotes NMDA Plasticity and Drives Social Stress Enhancement of Cocaine Conditioning**

**Jorge Tovar-Díaz, Matthew B. Pomrenze, Russell Kan, Bahram Pahlavan, and Hitoshi Morikawa**

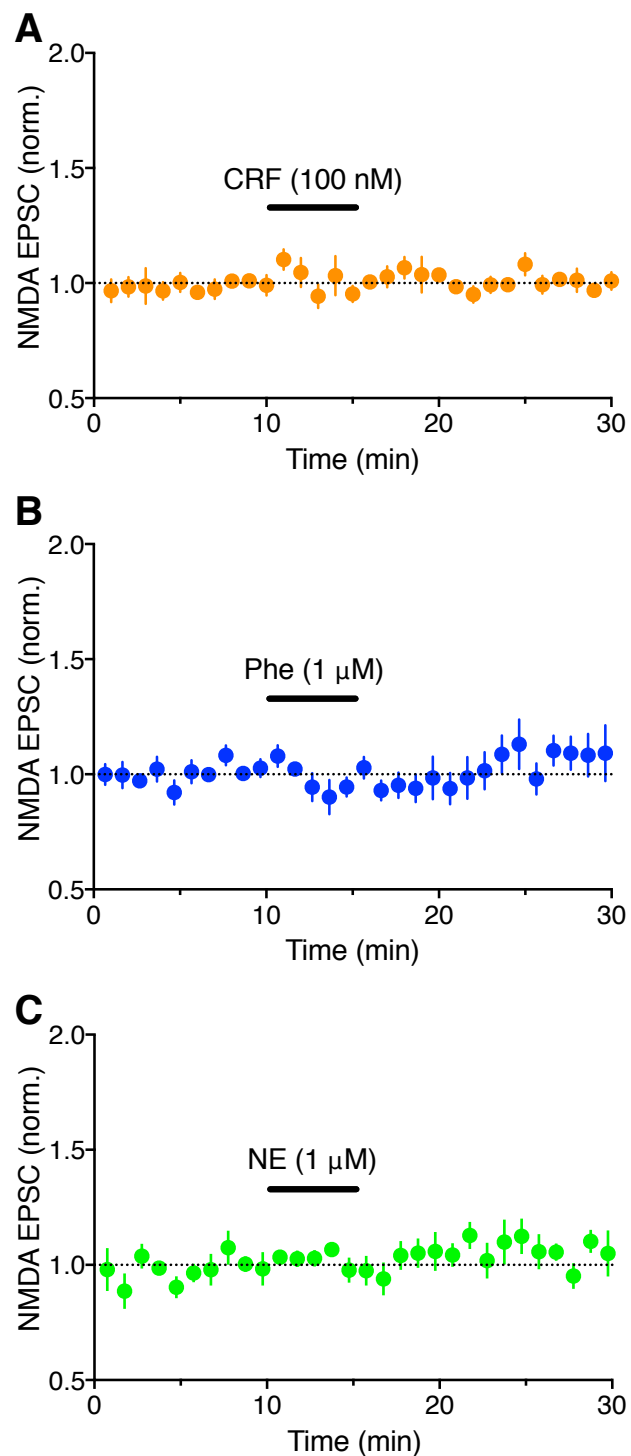

**Figure S1. CRF, phenylephrine, and NE do not affect NMDA transmission, Related to Figures 1-3**

Summary time graphs showing that CRF (A:  $n = 5$ ), phenylephrine (B:  $n = 5$ ), and NE (C:  $n = 7$ ) have no measurable effect on NMDA EPSCs. The EPSC amplitude in CRF, phenylephrine, and NE was not different from baseline EPSC amplitude (two-tailed paired t-test). Data are presented as mean  $\pm$  SEM.

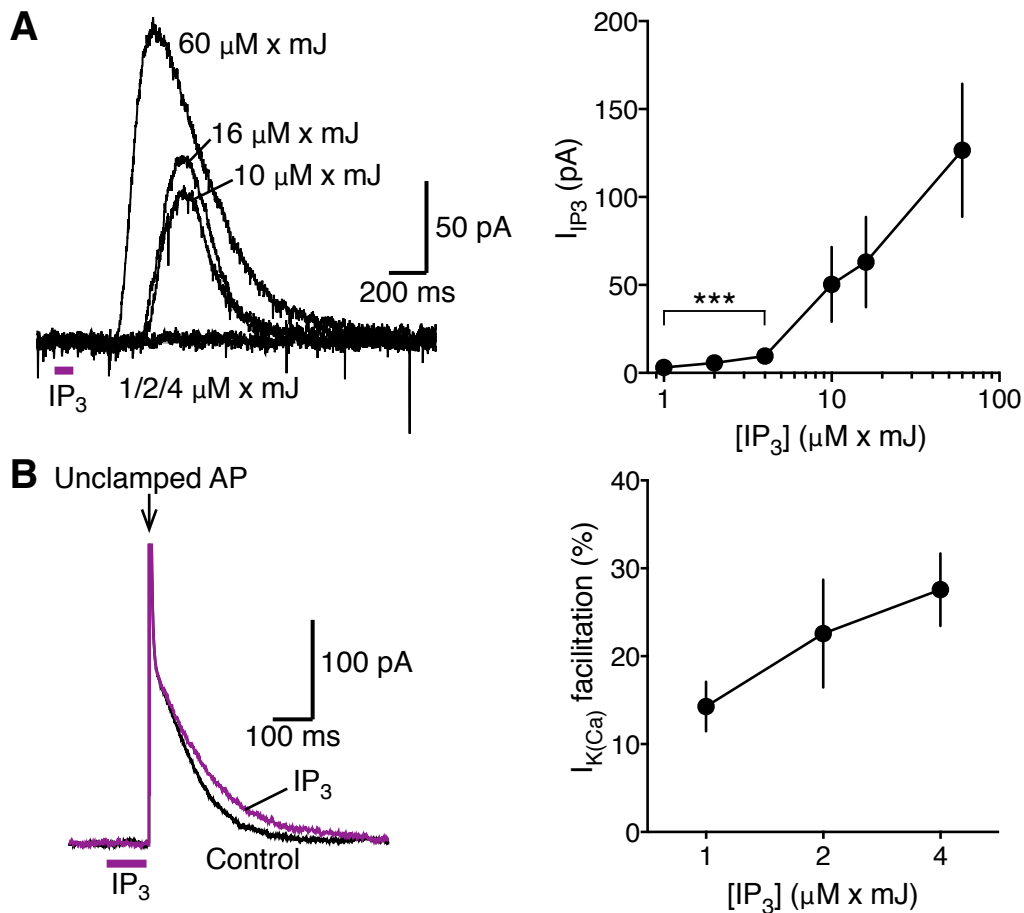

**Figure S2. Concentration dependence of IP<sub>3</sub> responses, Related to Figure 1**

(A) Example traces and summary graph depicting the concentration dependence of IP<sub>3</sub>-evoked SK currents ( $I_{IP_3}$ ). Data were obtained from 7 cells, where six different IP<sub>3</sub> concentrations (1, 2, 4, 10, 16, and 60  $\mu\text{M} \times \text{mJ}$ ; photolytically applied for 100 ms) were tested in each cell ( $F_{5,30} = 3.42$ ,  $p < 0.05$ , repeated measures one-way ANOVA). \*\*\* $p < 0.001$  vs 60  $\mu\text{M} \times \text{mJ}$  (Bonferroni post hoc test).

(B) Example traces (using 4  $\mu\text{M} \times \text{mJ}$  IP<sub>3</sub>) and summary graph illustrating facilitation of AP-evoked  $I_{K(Ca)}$  caused by low levels of IP<sub>3</sub> (1, 2, and 4  $\mu\text{M} \times \text{mJ}$ ;  $n = 14$ , 7, and 7, respectively;  $F_{2,25} = 3.03$ ,  $p = 0.067$ , one-way ANOVA). Note the relatively long latency (~200-400 ms) following application of higher concentrations of IP<sub>3</sub> (10, 16, and 60  $\mu\text{M} \times \text{mJ}$ ) to evoke measurable  $I_{IP_3}$ , which reflects the time required to engage the regenerative IP<sub>3</sub>R-mediated Ca<sup>2+</sup>-induced Ca<sup>2+</sup> release process. In contrast, IP<sub>3</sub> effect on AP-evoked  $I_{K(Ca)}$  occurs with no latency, as rapid Ca<sup>2+</sup> influx triggered by APs initiates the Ca<sup>2+</sup>-induced Ca<sup>2+</sup> release process, which can be augmented by low levels of IP<sub>3</sub>. Data are presented as mean  $\pm$  SEM.

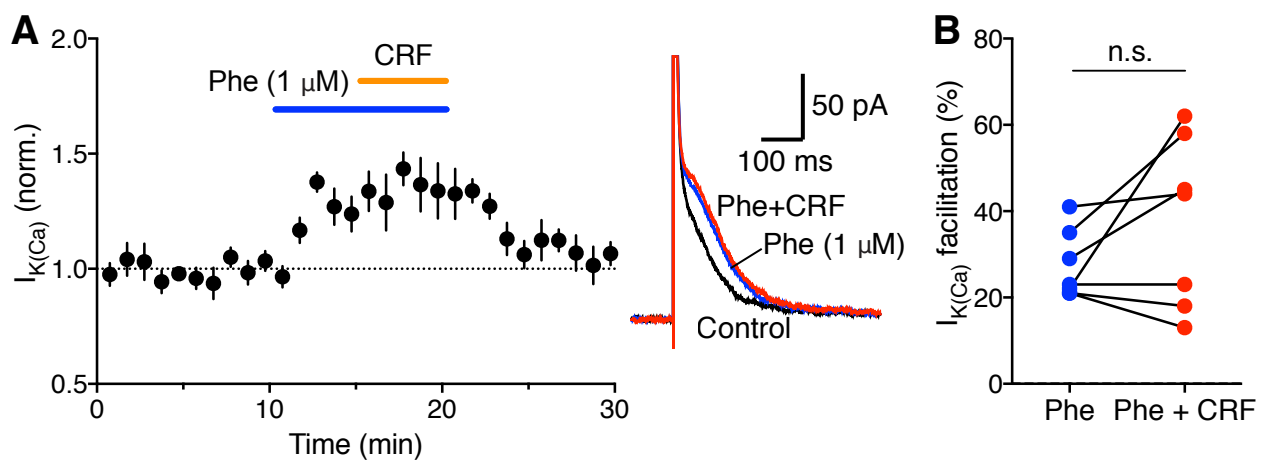

**Figure S3. CRF does not enhance the effects of high-concentration phenylephrine, Related to Figure 4**

(A) Summary time graph (left) and example traces (right) showing that CRF does not have significant effect on AP-evoked  $I_{K(Ca)}$  facilitated by a high concentration ( $1 \mu\text{M}$ ) of phenylephrine ( $n = 9$ ).

(B) Graph plotting the magnitude of  $I_{K(Ca)}$  facilitation caused by phenylephrine ( $1 \mu\text{M}$ ) alone and by CRF and phenylephrine in individual cells ( $t_6 = 1.57$ ,  $p = 0.17$ , two-tailed paired t-test). Data are presented as mean  $\pm$  SEM.

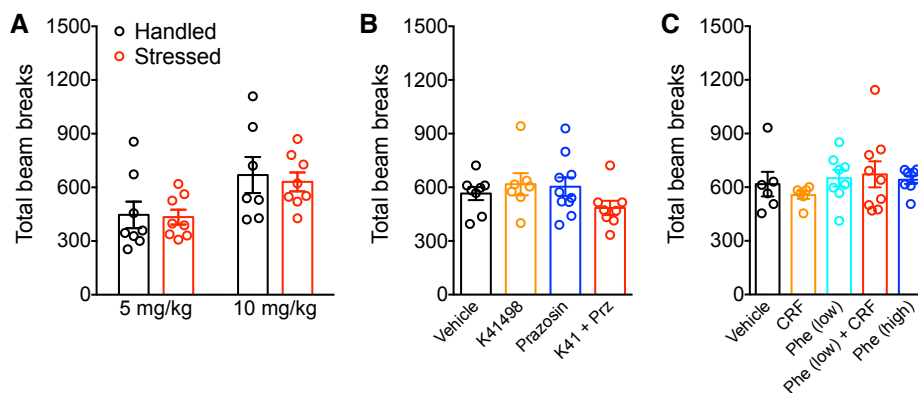

**Figure S4. Social defeat stress and VTA microinjections do not affect locomotor activity during cocaine conditioning, Related to Figures 6 and 7**

(A) Locomotor activity during cocaine conditioning of rats subjected to social defeat stress 10 min prior to conditioning ( $F_{1,27} = 0.035$ ,  $p = 0.85$ ; two-way ANOVA;  $n = 7-8$  rats).

(B) Locomotor activity during cocaine conditioning of rats subjected to social defeat stress and administered various antagonists into the VTA prior to stress ( $F_{3,29} = 1.45$ ,  $p = 0.25$ ; one-way ANOVA;  $n = 7-9$  rats).

(C) Locomotor activity during cocaine conditioning of rats administered various agonists into the VTA prior to conditioning ( $F_{4,32} = 0.62$ ,  $p = 0.65$ ; one-way ANOVA;  $n = 6-9$  rats).

Data are presented as mean  $\pm$  SEM.

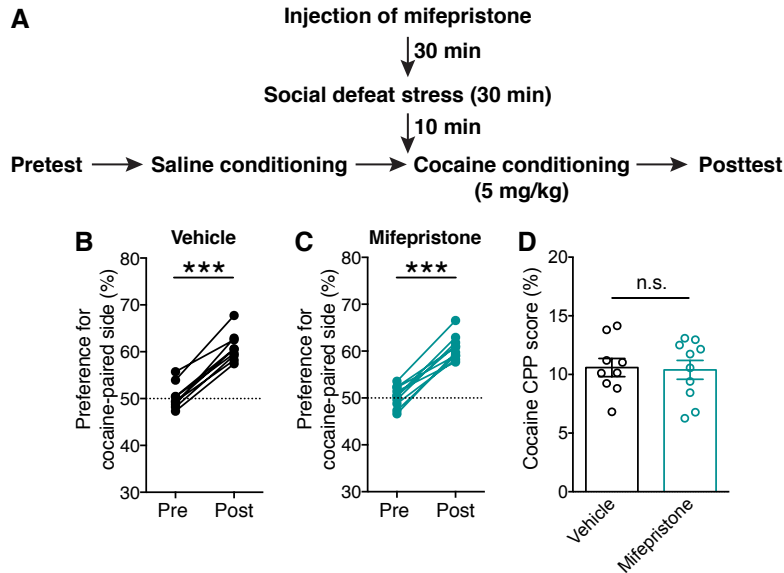

**Figure S5. Mifepristone administration does not prevent social defeat stress enhancement of cocaine conditioning, Related to Figure 7**

(A) Experimental timeline for testing the effects of mifepristone injections on defeat stress-induced enhancement of cocaine conditioning.

(B–C) Changes in the preference for the cocaine-paired side (conditioned with 5 mg/kg cocaine) in socially defeated rats that received systemic injection of vehicle (B) or mifepristone (C) (B:  $t_9 = 13.6$ ,  $p < 0.001$ ; C:  $t_9 = 12.94$ ,  $p < 0.001$ ; two-tailed paired t-test;  $n = 9-10$  rats).

(D) Summary graph demonstrating independence of glucocorticoid receptors for stress-induced enhancement of cocaine conditioning ( $t_{17} = 0.17$ ,  $p = 0.86$ ; two-tailed unpaired t-test).

Data are presented as mean  $\pm$  SEM.

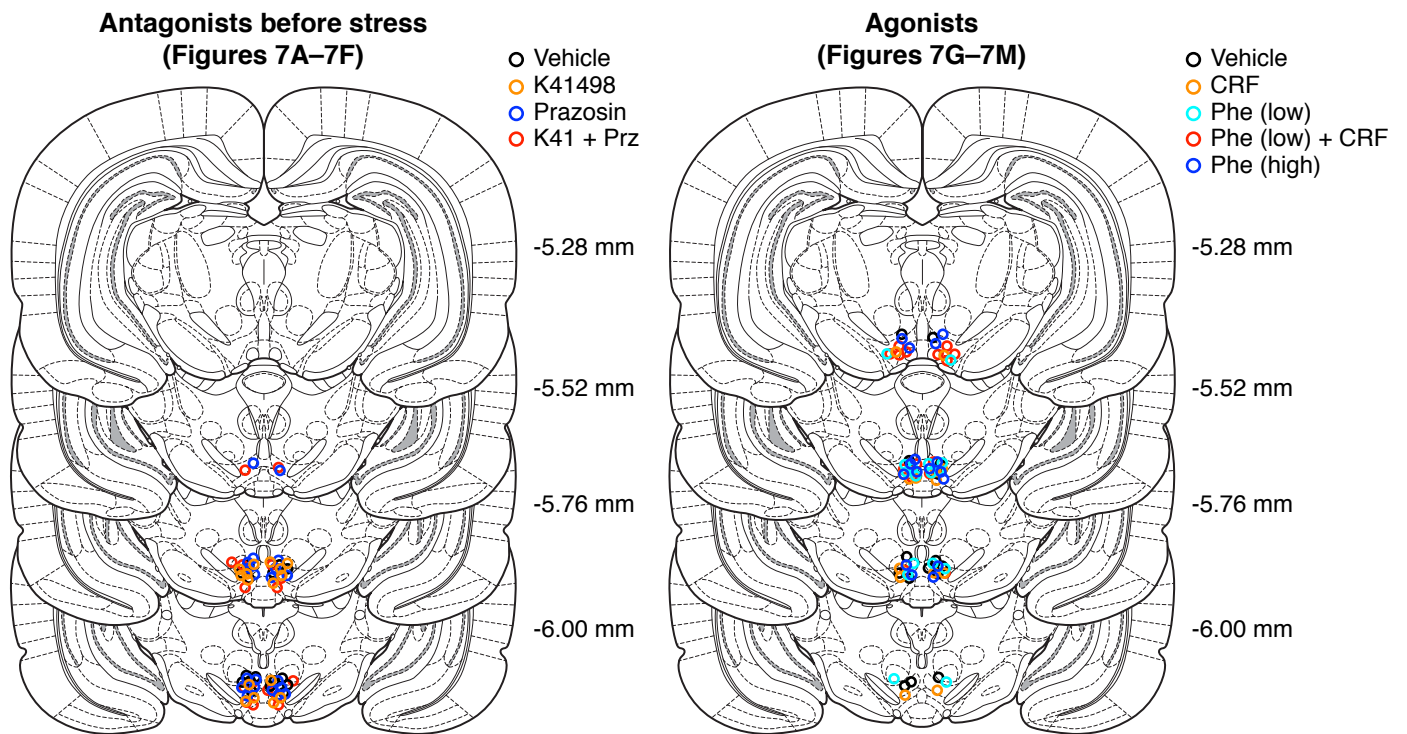

**Figure S6. Cannula locations in the VTA, Related to Figure 7**

Approximate locations (mm from bregma) of cannula tips for intra-VTA microinjection experiments in Figure 7.
